# Supplementary material
Source: ML conference proceedings conference paper supplement (https://openreview.net/forum?id=BwzggTWi8bM)
Supplement: supplementary_material [file attachment]

# Supplemental Material: Panoptic 3D Scene Reconstruction From a Single RGB Image

Manuel Dahnert

Ji Hou

Matthias Nießner

Angela Dai

Technical University of Munich

## A Additional Quantitative Results

In Table 1, we provide additional ablations on the effect of 3D refinement and completion as well as the 2d features. “Ours w/o 3D” evaluates the performance of the backprojected depth with the 2D instances. “Ours w/o 2D feat.” is trained without additional 2D features.

Additionally, in Tables 2, 3, and 4, we show the per-class results of PRQ, SRQ and RRQ on synthetic 3D-Front (3) data. The per-class results for the ablations with ground truth depth information are in Tables 5, 6, 7. This ablation also includes results with Sketch-Aware SSC (2). We also show the per-class results for PRQ, SRQ, and RRQ on real-world Matterport3D data in Tables 8, 9, and 10.

Table 1: Additional quantitative evaluations of Panoptic Reconstruction Quality on 3D-Front (3).

|                          | PRQ          | RSQ          | RRQ          | PRQ           | RSQ          | RRQ          | PRQ          | RSQ          | RRQ          |
|--------------------------|--------------|--------------|--------------|---------------|--------------|--------------|--------------|--------------|--------------|
|                          |              |              |              | <i>Things</i> |              |              | <i>Stuff</i> |              |              |
| SSCNet (6) + IC          | 11.50        | 32.90        | 33.00        | 8.03          | 32.07        | 24.69        | 26.95        | 36.75        | 70.25        |
| Mesh R-CNN (4)           | -            | -            | -            | 20.90         | 38.00        | 53.20        | -            | -            | -            |
| Total3D (5)              | 15.08        | 36.63        | 40.15        | 13.77         | 34.88        | 38.89        | 20.94        | 44.49        | 45.85        |
| <b>Ours w/o 3D</b>       | -            | -            | -            | 8.94          | 32.58        | 27.19        | -            | -            | -            |
| Ours w/o IP              | 20.65        | 53.87        | 29.62        | 8.48          | 48.30        | 15.07        | <b>75.40</b> | 78.95        | <b>95.10</b> |
| <b>Ours w/o 2D feat.</b> | 45.34        | 55.86        | 72.64        | 39.34         | 50.82        | <b>68.43</b> | 72.30        | 78.55        | 91.55        |
| Ours w/o hier.           | 44.05        | 55.31        | 70.54        | 37.34         | 50.12        | 65.33        | 74.20        | 78.65        | 93.95        |
| <b>Ours</b>              | <b>46.77</b> | <b>57.35</b> | <b>73.13</b> | <b>40.52</b>  | <b>52.52</b> | <b>68.43</b> | 74.90        | <b>79.10</b> | 94.25        |

Table 2: Per-class results of Panoptic Reconstruction Quality (PRQ) on 3D-Front (3).

|                | Cabinet      | Bed          | Chair        | Sofa         | Table        | Desk         | Dresser      | Lamp         | Other        | Wall         | Floor        |
|----------------|--------------|--------------|--------------|--------------|--------------|--------------|--------------|--------------|--------------|--------------|--------------|
| SSCNet + IC    | 7.80         | 16.60        | 7.90         | 13.30        | 12.10        | 5.50         | 0.50         | 0.70         | 7.90         | 15.20        | 38.70        |
| Mesh R-CNN     | 29.70        | 13.30        | 24.10        | 24.40        | 28.50        | 23.50        | 14.40        | 1.40         | 28.70        | -            | -            |
| Total3D        | 17.25        | 4.56         | 18.76        | 14.07        | 19.40        | 16.79        | 7.04         | 8.13         | 17.97        | 8.27         | 33.61        |
| Ours w/o 3D    | 9.70         | 2.00         | 11.10        | 2.40         | 13.20        | 2.10         | 10.40        | <b>13.70</b> | 15.90        | -            | -            |
| Ours w/o IP    | 8.50         | 25.00        | 9.30         | 2.40         | 11.70        | 4.20         | 3.00         | 0.00         | 12.20        | <b>64.90</b> | 85.90        |
| Ours w/o hier. | 42.70        | 58.70        | 32.00        | <b>56.40</b> | <b>36.30</b> | 17.00        | 44.50        | 0.00         | 48.50        | 64.10        | 84.30        |
| <b>Ours</b>    | <b>47.40</b> | <b>58.90</b> | <b>36.60</b> | 53.50        | 35.60        | <b>31.70</b> | <b>47.90</b> | 0.00         | <b>53.10</b> | 63.40        | <b>86.40</b> |

## B Architecture

We provide detailed versions of the network architecture: Figure 1 shows the 2D feature extraction, depth estimation and mask predictions, as well as the 2D-3D backprojection. Figure 2 shows the sparse, generative 3D U-Net. Each sparse and dense block consists of a 3D ResNet block.

Table 3: Per-class results of Segmentation Reconstruction Quality (SRQ) on 3D-Front (3).

|                | Cabinet      | Bed          | Chair        | Sofa         | Table        | Desk         | Dresser      | Lamp         | Other        | Wall         | Floor        |
|----------------|--------------|--------------|--------------|--------------|--------------|--------------|--------------|--------------|--------------|--------------|--------------|
| SSCNet + IC    | 30.90        | 31.40        | 31.90        | 31.00        | 34.30        | 36.70        | 0.00         | 0.00         | 33.40        | 30.80        | 41.90        |
| Mesh R-CNN     | 44.60        | 30.40        | 40.90        | 34.90        | 42.50        | 35.20        | 32.90        | 30.60        | 49.40        | -            | -            |
| Total3D        | 36.35        | 29.88        | 36.93        | 33.24        | 35.66        | 34.15        | 31.86        | 37.44        | 38.43        | 42.42        | 46.55        |
| Ours w/o 3D    | 29.80        | 27.60        | 28.40        | 37.50        | 32.80        | 29.80        | 31.60        | <b>41.10</b> | 34.60        | -            | -            |
| Ours w/o IP    | 54.40        | <b>62.40</b> | 47.40        | 42.00        | 56.20        | 44.60        | <b>66.80</b> | 0.00         | 60.90        | <b>70.80</b> | 87.10        |
| Ours w/o hier. | 61.40        | 58.70        | 47.90        | <b>59.80</b> | 55.50        | 49.60        | 55.20        | 0.00         | 63.00        | 70.60        | 86.70        |
| <b>Ours</b>    | <b>66.70</b> | 58.90        | <b>51.50</b> | 59.60        | <b>58.50</b> | <b>56.10</b> | 56.90        | 0.00         | <b>64.50</b> | 70.70        | <b>87.50</b> |

Table 4: Per-class results of Recognition Reconstruction Quality (RRQ) on 3D-Front (3).

|                | Cabinet      | Bed           | Chair        | Sofa         | Table        | Desk         | Dresser      | Lamp         | Other        | Wall         | Floor        |
|----------------|--------------|---------------|--------------|--------------|--------------|--------------|--------------|--------------|--------------|--------------|--------------|
| SSCNet + IC    | 23.50        | 45.80         | 23.50        | 57.60        | 34.20        | 21.10        | 0.00         | 0.00         | 22.40        | 46.00        | 92.70        |
| Mesh R-CNN     | 66.70        | 43.70         | 58.80        | 69.80        | <b>67.10</b> | <b>66.70</b> | 43.80        | 4.70         | 58.00        | -            | -            |
| Total3D        | 47.46        | 15.25         | 50.81        | 42.33        | 54.41        | 49.15        | 22.10        | 21.70        | 46.76        | 19.49        | 72.20        |
| Ours w/o 3D    | 32.50        | 7.30          | 39.00        | 6.50         | 40.20        | 7.10         | 32.90        | <b>33.30</b> | 45.90        | -            | -            |
| Ours w/o IP    | 15.60        | 40.00         | 19.60        | 5.70         | 20.80        | 9.50         | 4.40         | 0.00         | 20.00        | <b>91.60</b> | 98.60        |
| Ours w/o hier. | 69.60        | <b>100.00</b> | 66.90        | <b>94.30</b> | 65.40        | 34.30        | 80.60        | 0.00         | 76.90        | 90.70        | 97.20        |
| <b>Ours</b>    | <b>71.10</b> | <b>100.00</b> | <b>71.10</b> | 89.80        | 60.80        | 56.50        | <b>84.20</b> | 0.00         | <b>82.40</b> | 89.70        | <b>98.80</b> |

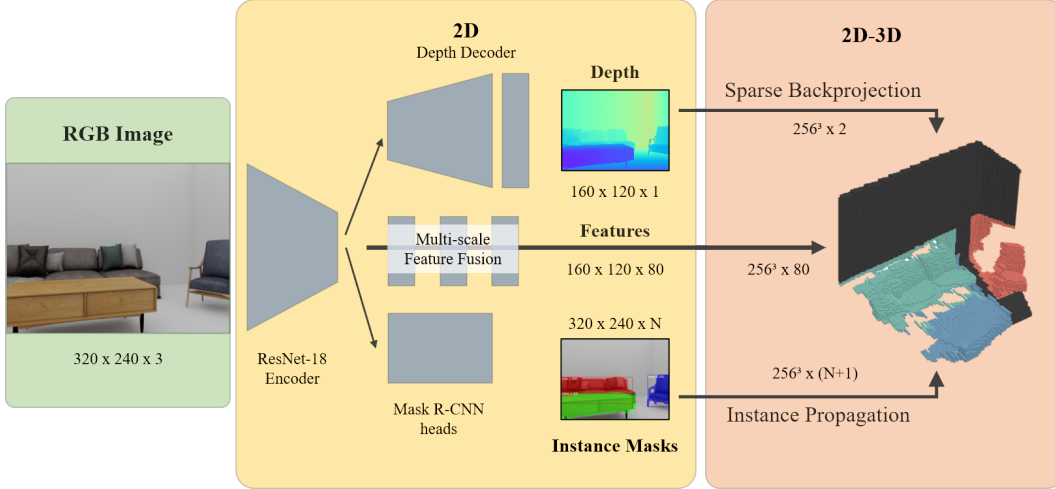

Figure 1: First part of the network architecture.

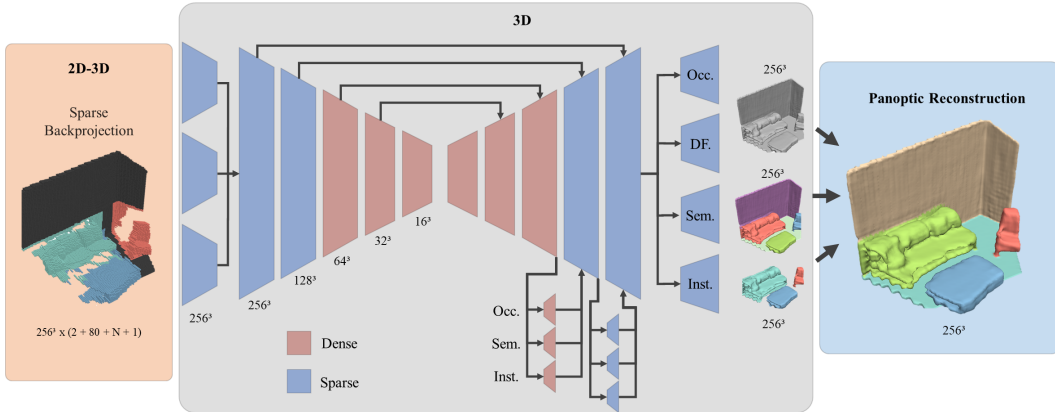

Figure 2: Second part of the network architecture.

Table 5: Per-class results of Panoptic Reconstruction Quality (PRQ) on 3D-Front (3) with ground truth depth information.

|                         | Cabinet      | Bed          | Chair        | Sofa         | Table        | Desk         | Dresser      | Lamp         | Other        | Wall         | Floor        |
|-------------------------|--------------|--------------|--------------|--------------|--------------|--------------|--------------|--------------|--------------|--------------|--------------|
| SSCNet + IC w/ GT depth | 9.10         | 21.50        | 14.90        | 16.20        | 15.00        | 9.20         | 2.40         | 10.60        | 12.30        | 24.80        | 38.70        |
| Sketch + IC w/ GT depth | 21.80        | 38.20        | 18.20        | 32.70        | 27.10        | 30.90        | 25.30        | 22.40        | 18.50        | 29.20        | 22.00        |
| Mesh R-CNN w/ GT z      | 38.70        | 27.00        | <b>45.20</b> | 29.00        | <b>38.90</b> | 30.40        | 20.50        | <b>44.40</b> | 47.70        | -            | -            |
| <b>Ours</b>             | <b>42.60</b> | <b>58.50</b> | 40.50        | <b>54.50</b> | 36.10        | <b>34.10</b> | <b>54.10</b> | 0.00         | <b>54.60</b> | <b>75.10</b> | <b>78.80</b> |

Table 6: Per-class results of Segmentation Reconstruction Quality (SRQ) on 3D-Front (3) with ground truth depth information.

|                         | Cabinet      | Bed          | Chair        | Sofa         | Table        | Desk         | Dresser      | Lamp         | Other        | Wall         | Floor        |
|-------------------------|--------------|--------------|--------------|--------------|--------------|--------------|--------------|--------------|--------------|--------------|--------------|
| SSCNet + IC w/ GT depth | 32.20        | 33.60        | 33.30        | 32.00        | 36.90        | 31.40        | 29.00        | 34.00        | 34.10        | 31.50        | 42.90        |
| Sketch + IC w/ GT depth | 35.10        | 39.40        | 38.30        | 37.10        | 36.50        | 42.10        | 36.70        | 36.80        | 32.70        | 33.00        | 30.00        |
| Mesh R-CNN w/ GT z      | 48.90        | 33.60        | 50.40        | 38.00        | 46.90        | 40.30        | 35.60        | <b>54.40</b> | 56.50        | -            | -            |
| <b>Ours</b>             | <b>62.30</b> | <b>58.50</b> | <b>54.50</b> | <b>59.40</b> | <b>51.90</b> | <b>52.20</b> | <b>60.70</b> | 0.00         | <b>62.70</b> | <b>75.50</b> | <b>81.20</b> |

## C Data

We use the synthetic data of 3D-Front (3) and real-world 3D scans of Matterport3D (1) for training and evaluation of the panoptic 3D scene reconstruction task. Both datasets are licensed under non-commercial use<sup>12</sup>. Collection of the data was obtained by Alibaba and Matterport, respectively, from the designers and owners, and the data anonymized without any offensive content.

<sup>1</sup><https://tianchi.aliyun.com/specials/promotion/alibaba-3d-scene-dataset>

<sup>2</sup>[http://kaldir.vc.in.tum.de/matterport/MP\\_TOS.pdf](http://kaldir.vc.in.tum.de/matterport/MP_TOS.pdf)

Table 7: Per-class results of Recognition Reconstruction Quality (RRQ) on 3D-Front (3) with ground truth depth information.

|                         | Cabinet      | Bed           | Chair        | Sofa         | Table        | Desk         | Dresser      | Lamp         | Other        | Wall         | Floor        |
|-------------------------|--------------|---------------|--------------|--------------|--------------|--------------|--------------|--------------|--------------|--------------|--------------|
| SSCNet + IC w/ GT depth | 28.20        | 63.90         | 44.60        | 50.60        | 40.60        | 29.20        | 8.10         | 31.20        | 36.20        | 78.80        | 90.30        |
| Sketch + IC w/ GT depth | 62.10        | 97.00         | 47.40        | 88.00        | 76.80        | 73.30        | 69.00        | 60.70        | 56.60        | 88.50        | 73.50        |
| Mesh R-CNN w/ GT z      | <b>79.10</b> | 80.20         | <b>89.80</b> | 76.40        | <b>82.80</b> | <b>75.30</b> | 57.50        | <b>81.50</b> | 84.40        | -            | -            |
| <b>Ours</b>             | 68.30        | <b>100.00</b> | 74.30        | <b>91.80</b> | 69.50        | 65.30        | <b>89.20</b> | 0.00         | <b>87.10</b> | <b>99.40</b> | <b>97.00</b> |

Table 8: Per-class results of Panoptic Reconstruction Quality (PRQ) on Matterport3d (1).

|             | Cabinet      | Bed          | Chair        | Sofa         | Table       | Desk | Dresser | Lamp        | Other       | Wall         | Floor        | Ceiling     |
|-------------|--------------|--------------|--------------|--------------|-------------|------|---------|-------------|-------------|--------------|--------------|-------------|
| SSCNet + IC | 0.07         | 0.11         | 0.61         | 0.07         | 0.53        | 0.00 | 0.00    | 0.00        | 0.19        | 0.34         | 3.96         | 0.00        |
| Mesh R-CNN  | 3.10         | 10.00        | <b>14.80</b> | 12.00        | <b>7.90</b> | 0.00 | 0.00    | <b>2.80</b> | <b>6.00</b> | -            | -            | -           |
| <b>Ours</b> | <b>12.33</b> | <b>10.24</b> | 9.75         | <b>14.40</b> | <b>8.07</b> | 0.00 | 0.00    | 0.00        | 2.26        | <b>10.92</b> | <b>16.54</b> | <b>4.88</b> |

## References

- [1] Angel Chang, Angela Dai, Thomas Funkhouser, Maciej Halber, Matthias Niessner, Manolis Savva, Shuran Song, Andy Zeng, and Yinda Zhang. Matterport3D: Learning from RGB-D data in indoor environments. *International Conference on 3D Vision (3DV)*, 2017.
- [2] Xiaokang Chen, Kwan-Yee Lin, Chen Qian, Gang Zeng, and Hongsheng Li. 3d sketch-aware semantic scene completion via semi-supervised structure prior. In *Proceedings of the IEEE/CVF Conference on Computer Vision and Pattern Recognition*, pages 4193–4202, 2020.
- [3] Huan Fu, Bowen Cai, Lin Gao, Lingxiao Zhang, Jiaming Wang Cao Li, Zengqi Xun, Chengyue Sun, Rongfei Jia, Binqiang Zhao, and Hao Zhang. 3d-front: 3d furnished rooms with layouts and semantics. *arXiv preprint arXiv:2011.09127*, 2021.
- [4] Georgia Gkioxari, Jitendra Malik, and Justin Johnson. Mesh r-cnn. In *Proceedings of the IEEE/CVF International Conference on Computer Vision*, pages 9785–9795, 2019.
- [5] Yinyu Nie, Xiaoguang Han, Shihui Guo, Yujian Zheng, Jian Chang, and Jian Jun Zhang. Total3dunderstanding: Joint layout, object pose and mesh reconstruction for indoor scenes from a single image. In *Proceedings of the IEEE/CVF Conference on Computer Vision and Pattern Recognition*, pages 55–64, 2020.
- [6] Shuran Song, Fisher Yu, Andy Zeng, Angel X Chang, Manolis Savva, and Thomas Funkhouser. Semantic scene completion from a single depth image. *Proceedings of 30th IEEE Conference on Computer Vision and Pattern Recognition*, 2017.

Table 9: Per-class results of Segmentation Reconstruction Quality (SRQ) on Matterport3d (1).

|             | Cabinet      | Bed          | Chair        | Sofa         | Table        | Desk | Dresser | Lamp         | Other        | Wall         | Floor        | Ceiling      |
|-------------|--------------|--------------|--------------|--------------|--------------|------|---------|--------------|--------------|--------------|--------------|--------------|
| SSCNet + IC | 35.10        | 27.50        | 33.70        | 35.40        | 35.30        | 0.00 | 0.00    | 0.00         | <b>31.90</b> | 28.60        | 32.70        | 0.00         |
| Mesh R-CNN  | 37.10        | <b>39.10</b> | <b>43.80</b> | 38.20        | 39.40        | 0.00 | 0.00    | <b>41.00</b> | 41.50        | -            | -            | -            |
| <b>Ours</b> | <b>40.30</b> | 35.20        | 42.20        | <b>38.60</b> | <b>47.20</b> | 0.00 | 0.00    | 0.00         | 31.00        | <b>37.40</b> | <b>42.40</b> | <b>40.30</b> |

Table 10: Per-class results of Recognition Reconstruction Quality (RRQ) on Matterport3d (1).

|             | Cabinet      | Bed          | Chair        | Sofa         | Table        | Desk | Dresser | Lamp        | Other        | Wall         | Floor        | Ceiling      |
|-------------|--------------|--------------|--------------|--------------|--------------|------|---------|-------------|--------------|--------------|--------------|--------------|
| SSCNet + IC | 0.20         | 0.40         | 1.80         | 0.20         | 1.50         | 0.00 | 0.00    | 0.00        | 0.60         | 1.20         | 12.10        | 0.00         |
| Mesh R-CNN  | 8.30         | 25.60        | <b>33.90</b> | 31.40        | <b>20.10</b> | 0.00 | 0.00    | <b>6.70</b> | <b>14.40</b> | -            | -            | -            |
| <b>Ours</b> | <b>30.60</b> | <b>29.10</b> | 23.10        | <b>37.30</b> | 17.10        | 0.00 | 0.00    | 0.00        | 7.30         | <b>29.20</b> | <b>39.00</b> | <b>12.10</b> |

## D Checklist

1. For all authors...
  - (a) Do the main claims made in the abstract and introduction accurately reflect the paper’s contributions and scope? [\[Yes\]](#) The main claims are presented in Section 1, and supported by comparison and ablations in Section 6.
  - (b) Did you describe the limitations of your work? [\[Yes\]](#) See Section 6.5.
  - (c) Did you discuss any potential negative societal impacts of your work? [\[Yes\]](#) See the Broader Impact section.
  - (d) Have you read the ethics review guidelines and ensured that your paper conforms to them? [\[Yes\]](#)
2. If you are including theoretical results...
  - (a) Did you state the full set of assumptions of all theoretical results? [\[N/A\]](#)
  - (b) Did you include complete proofs of all theoretical results? [\[N/A\]](#)
3. If you ran experiments...
  - (a) Did you include the code, data, and instructions needed to reproduce the main experimental results (either in the supplemental material or as a URL)? [\[No\]](#) Code and data to be release publicly.
  - (b) Did you specify all the training details (e.g., data splits, hyperparameters, how they were chosen)? [\[Yes\]](#) See Sections 4.1 and 6.
  - (c) Did you report error bars (e.g., with respect to the random seed after running experiments multiple times)? [\[No\]](#)
  - (d) Did you include the total amount of compute and the type of resources used (e.g., type of GPUs, internal cluster, or cloud provider)? [\[Yes\]](#) See Section 4.1.
4. If you are using existing assets (e.g., code, data, models) or curating/releasing new assets...
  - (a) If your work uses existing assets, did you cite the creators? [\[Yes\]](#) We use synthetic 3D data from 3D-Front (3) and real-world 3D data from Matterport3D (1).
  - (b) Did you mention the license of the assets? [\[Yes\]](#) See the data section of the supplemental material
  - (c) Did you include any new assets either in the supplemental material or as a URL? [\[No\]](#)
  - (d) Did you discuss whether and how consent was obtained from people whose data you’re using/curating? [\[Yes\]](#) See the data section of the supplemental material
  - (e) Did you discuss whether the data you are using/curating contains personally identifiable information or offensive content? [\[Yes\]](#) See the data section of the supplemental material
5. If you used crowdsourcing or conducted research with human subjects...
  - (a) Did you include the full text of instructions given to participants and screenshots, if applicable? [\[N/A\]](#)
  - (b) Did you describe any potential participant risks, with links to Institutional Review Board (IRB) approvals, if applicable? [\[N/A\]](#)
  - (c) Did you include the estimated hourly wage paid to participants and the total amount spent on participant compensation? [\[N/A\]](#)
